# Supplementary material for: The Antimicrobial Peptide Cathelicidin Exerts Immunomodulatory Effects via Scavenger Receptors
Source: MDPI journal article supplement (doi:10.3390/ijms24010875), 2023-01-03
Supplement: s1 [file s1]

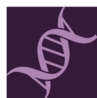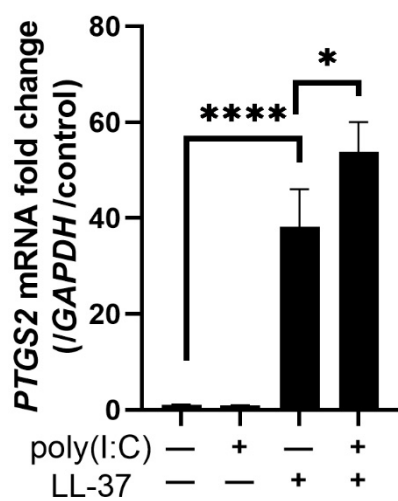

(a)

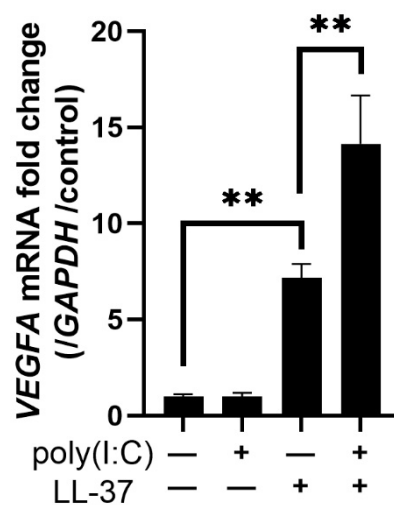

(b)

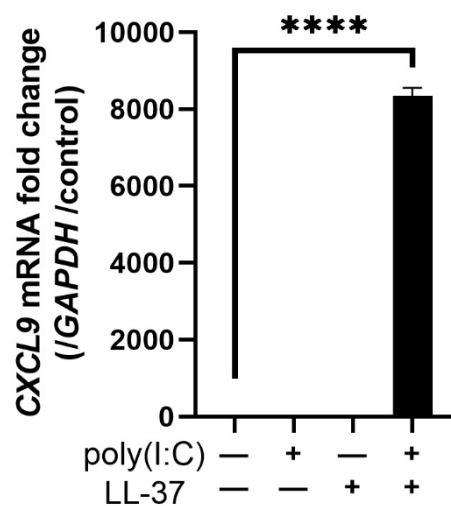

(c)

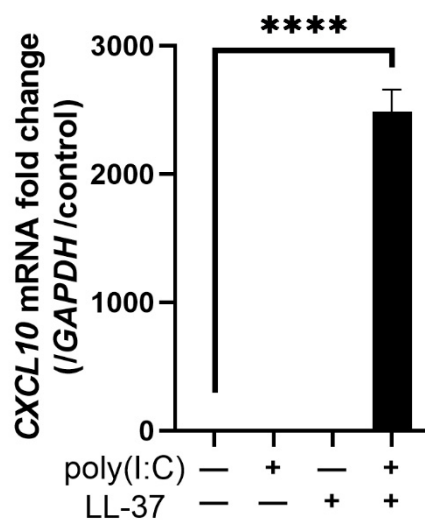

(d)

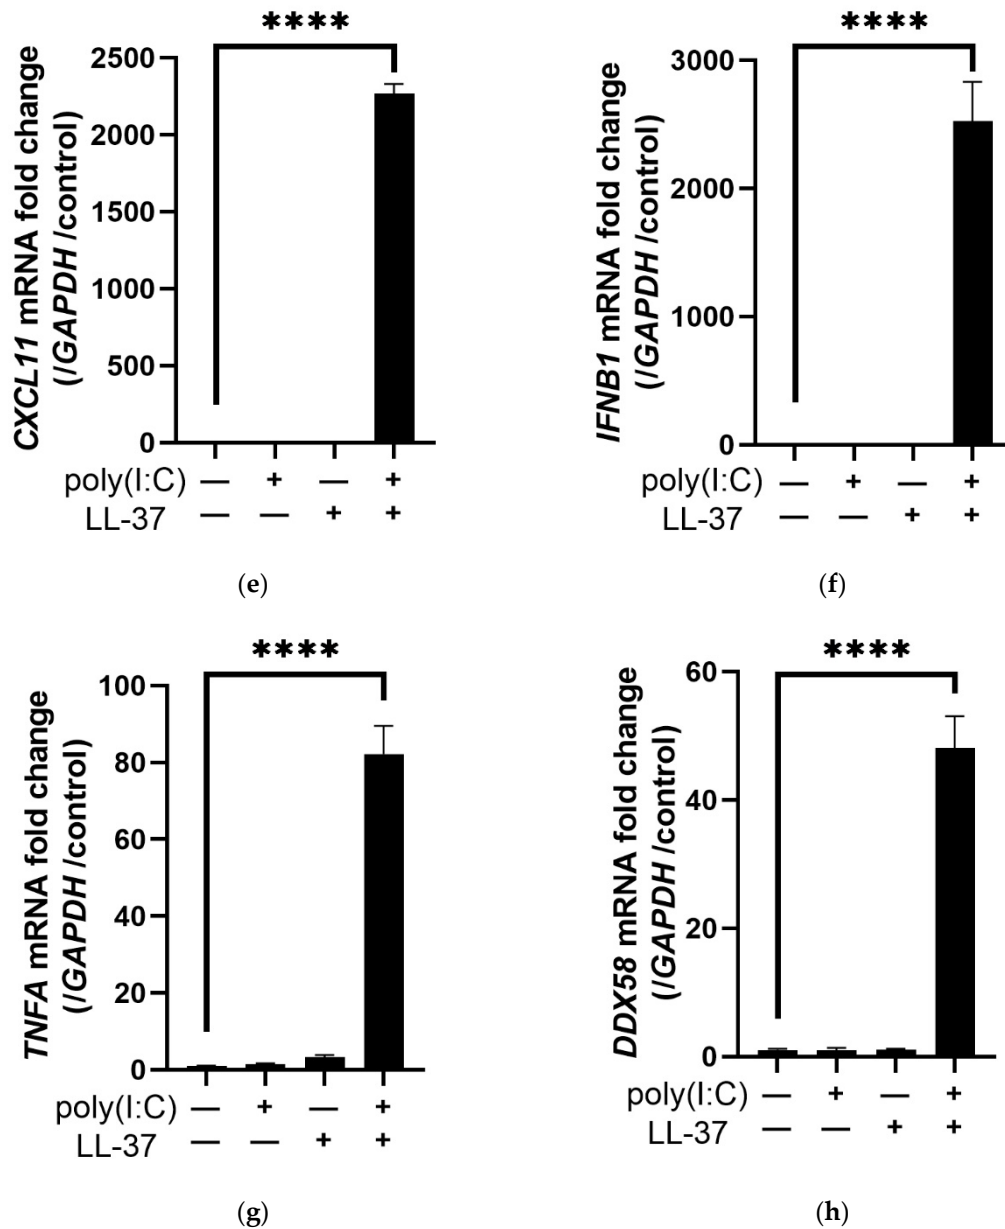

**Figure S1. Various mRNAs were induced by stimulation with LL-37 alone or in combination with poly(I:C) in keratinocytes.**

NHEKs were stimulated with LL-37 and poly(I:C) alone or in combination and incubated for 6 h. mRNA was extracted and relatively quantified by RT-PCR. (a) *PTGS2* and (b) *VEGFA* were mainly induced by LL-37 stimulation alone. (c) *CXCL9*, (d) *CXCL10*, (e) *CXCL11*, (f) *IFNB1*, (g) *TNFA*, and (h) *DDX58* were significantly induced by co-stimulation with LL-37 and poly(I:C). Data are means  $\pm$  SEM of three biological replicates. \*  $p \leq 0.05$ , \*\* $p \leq 0.01$ , \*\*\*\* $p \leq 0.0001$  by two-way ANOVA with Bonferroni's post hoc test.

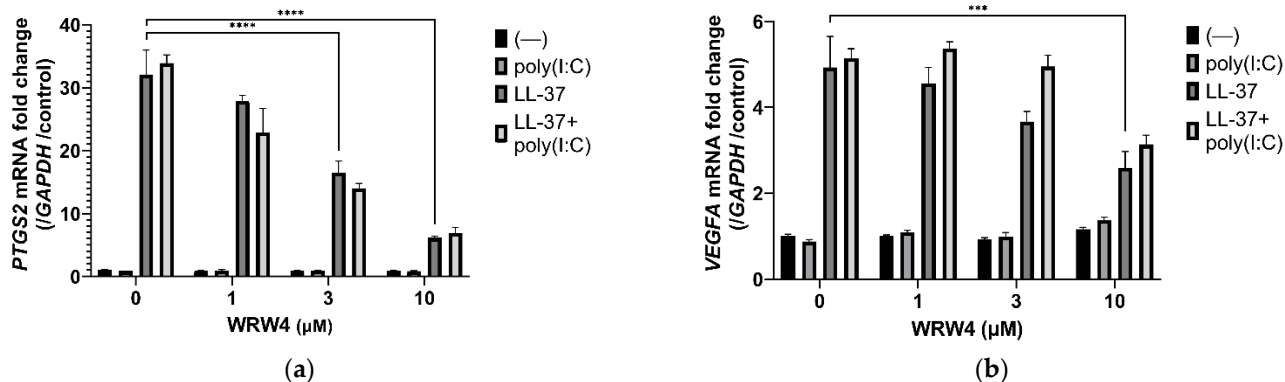

**Figure S2. Induction of *PTGS2* and *VEGFA* by LL-37 was decreased depending on the dose of WRW4 in NHEKs.**

WRW4 (an FPR2 inhibitor) was applied to NHEKs at concentrations of 0–10  $\mu\text{M}$ , and the cells were stimulated with LL-37 and poly(I:C) 1 h later. Cells were lysed and collected after 6 h of culture, and mRNA expressions of (a) *PTGS2* and (b) *VEGFA* were relatively quantified by RT-PCR. Data are means  $\pm$  SEM of three biological replicates. \*\*\* $p \leq 0.001$ , \*\*\*\* $p \leq 0.0001$  by two-way ANOVA with Bonferroni's post hoc test.

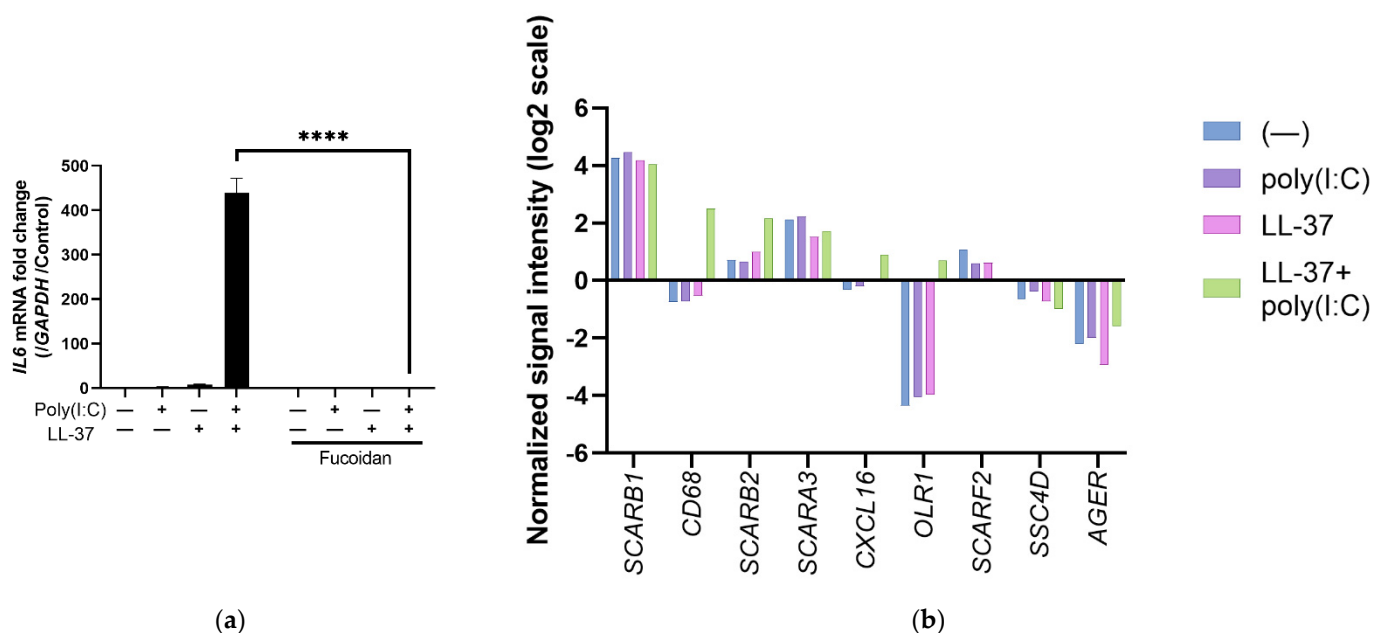

**Figure S3. Signal intensities of various scavenger receptors in DNA microarrays.**

(a) NHEKs were stimulated with LL-37 alone or in combination with poly(I:C), with or without fucoidan, an inhibitor for multiple scavenger receptors, at a final concentration of 10  $\mu\text{g/ml}$  for 6 h. mRNA was extracted and relatively quantified by RT-PCR. (b) NHEKs were stimulated with LL-37 and poly(I:C) alone or in combination and analyzed by DNA microarray. The signal intensities of scavenger receptors were examined, and the top 9 genes are shown. The expressions of *SCARB1* (SR-B1), *CD68* (SR-D1), *SCARB2* (SR-B2), *SCARA3* (SR-A3), *CXCL16* (SR-PSOX), *OLR1* (SR-E1), *SCARF2* (SR-F2), *SSC4D*, and *AGER* (SR-J1) are shown in order of signal intensity when stimulated with LL-37 and poly(I:C).

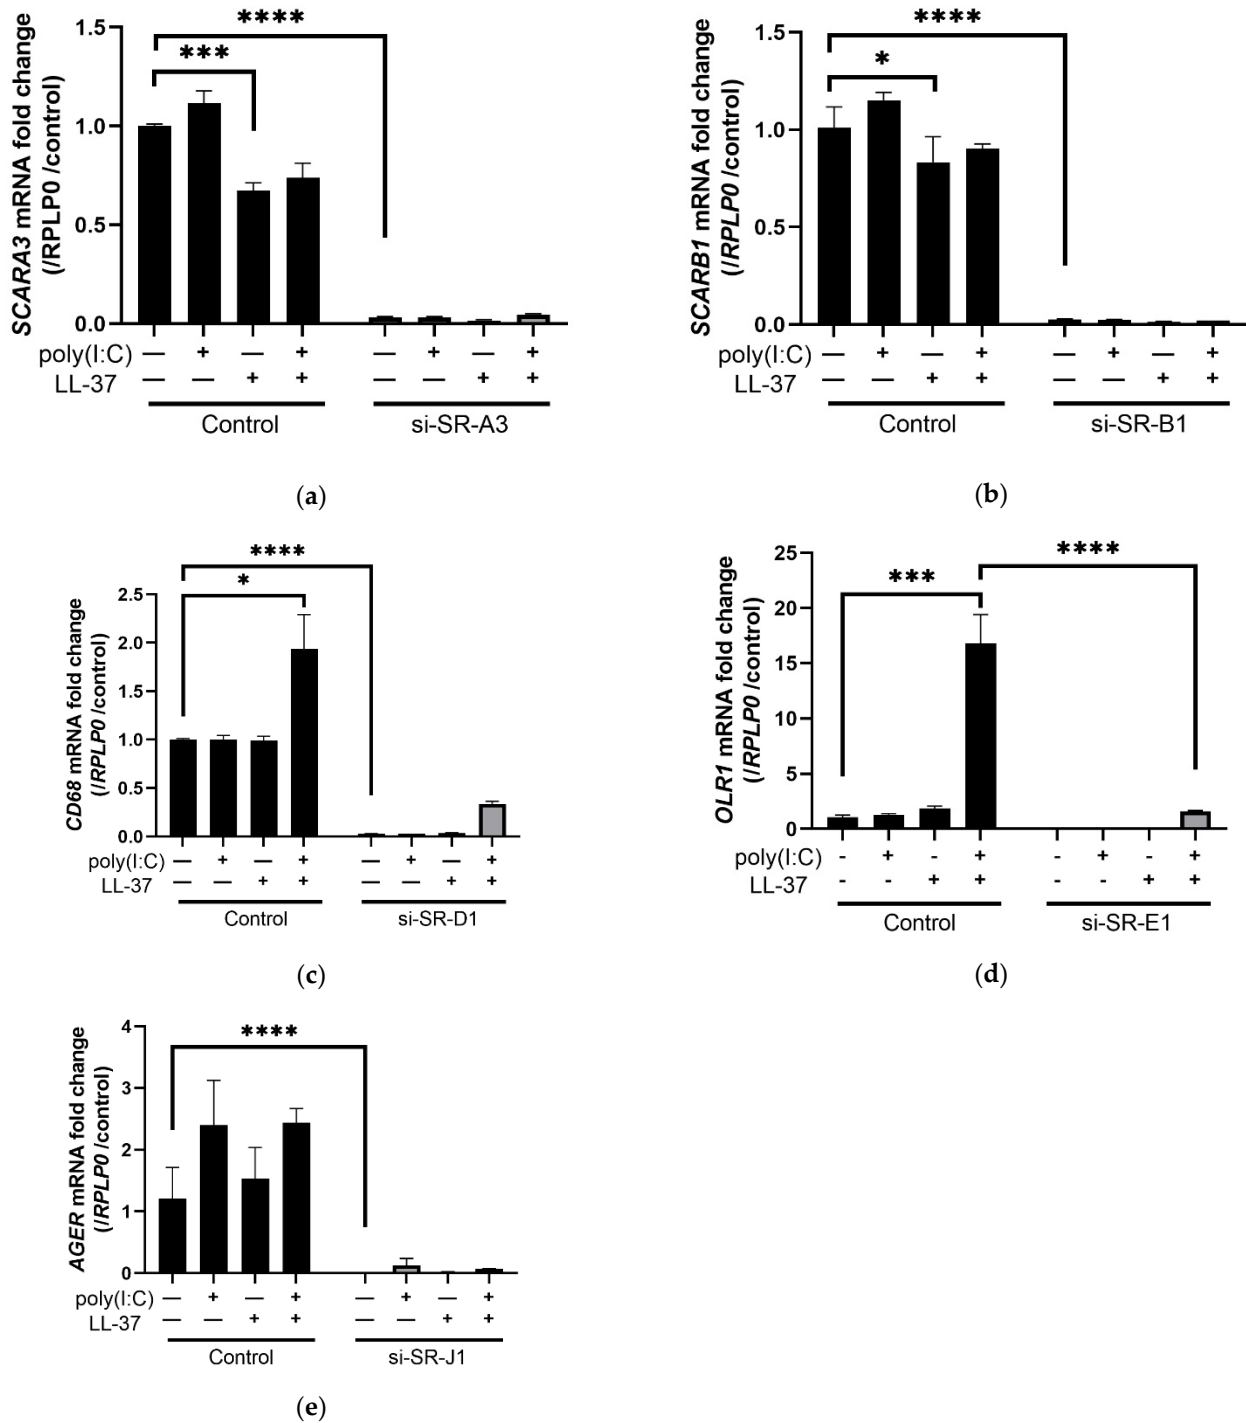

**Figure S4. Expressions of scavenger receptors were decreased by transfection with their siRNAs.**

NHEKs were transfected with siRNAs of various scavenger receptors, stimulated with LL-37 and poly(I:C), and RT-PCR analysis was carried out. Samples were the same as in Figure 3a-e. The mRNA expressions of (a) *SCARA3* (SR-A3), (b) *SCARB1* (SR-B1), (c) *CD68* (SR-D1), (d) *OLR1* (SR-E1), and (e) *AGER* (SR-J1) are shown. Data are means  $\pm$  SEM of three biological replicates. NS,  $p > 0.05$ , \*  $p \leq 0.05$ , \*\*  $p \leq 0.01$ , \*\*\*  $p \leq 0.001$ , \*\*\*\*  $p \leq 0.0001$  by two-way ANOVA with Bonferroni's post hoc test.

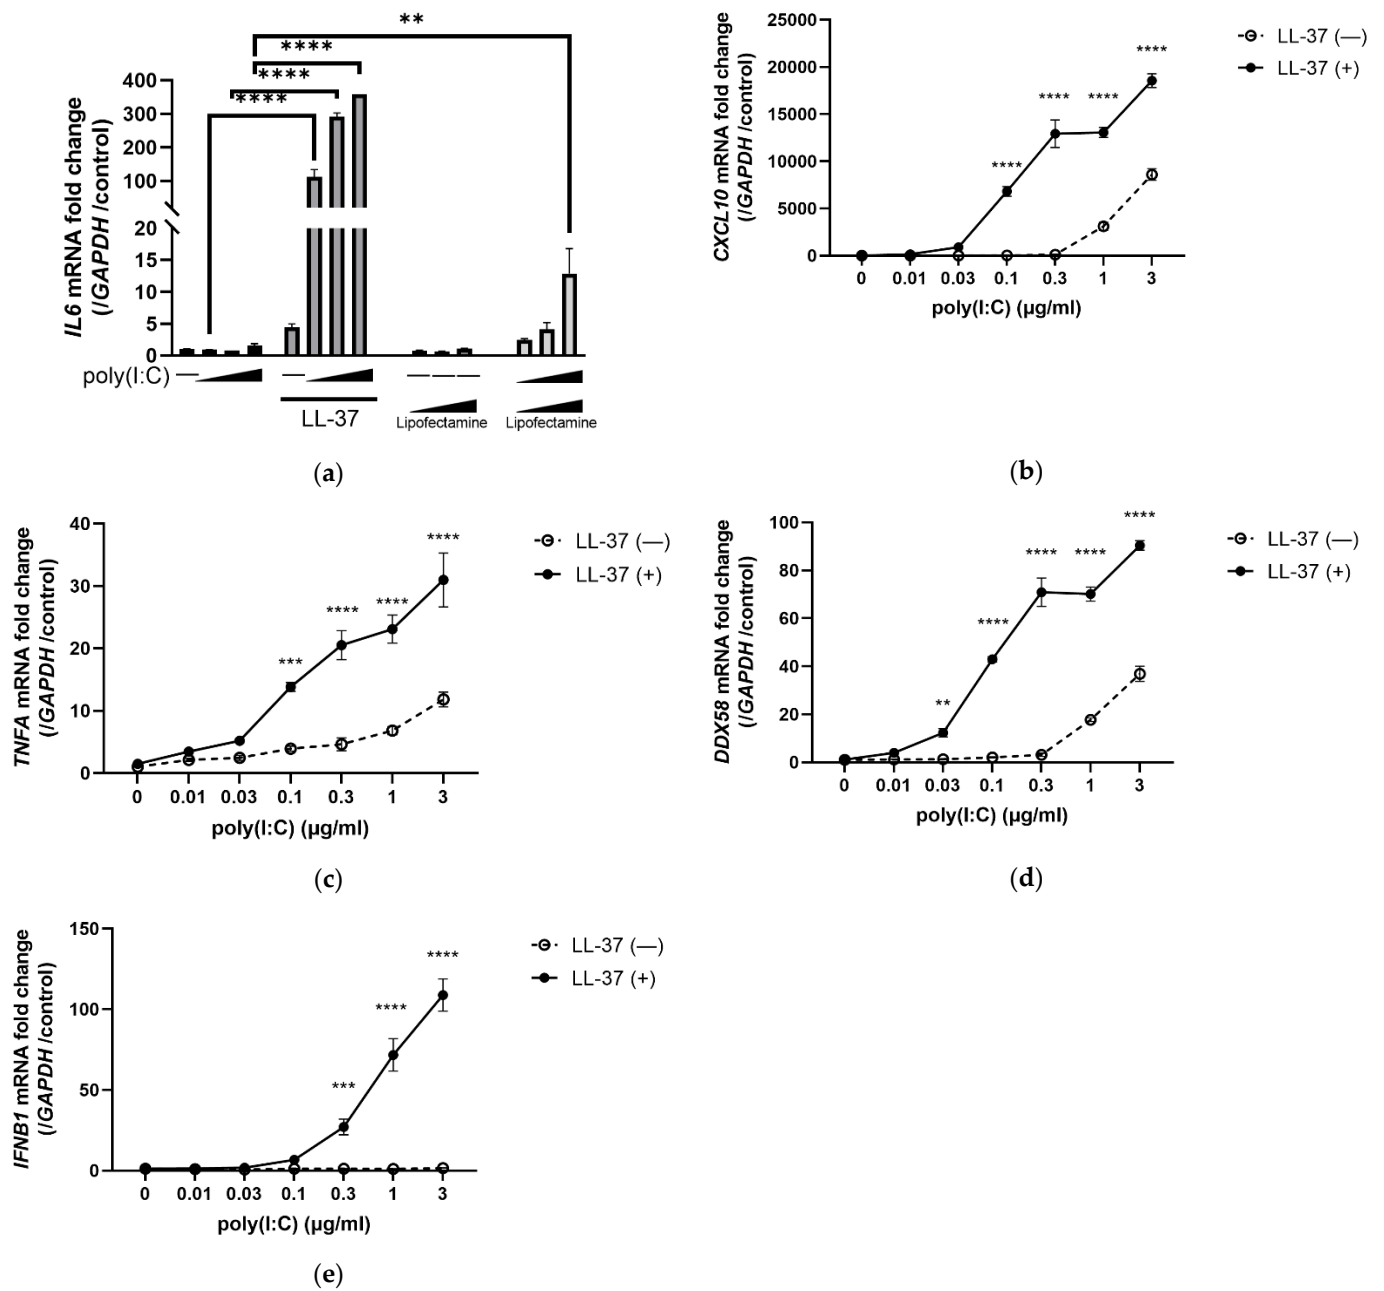

**Figure S5. Poly(I:C) induced cytokines in combination with a transfection reagent or at high concentration, but to a weaker extent than with LL-37.**

(a) NHEKs were stimulated with poly(I:C) and LL-37 or Lipofectamine 3000 reagent alone or in combination. Poly(I:C) was used at 0.1, 0.3, and 1 µg/ml, and Lipofectamine 3000 reagent was pre-mixed and administered according to the amount of poly(I:C) used. The induction of *IL6* mRNA after 6 hours of stimulation was shown. Data are means  $\pm$  SEM of two biological replicates. NHEKs were stimulated with poly(I:C) at different concentrations (0.01–3 µg/ml) alone or in combination with LL-37. RT-PCR was performed to quantify the mRNA expressions of (b) *CXCL10*, (c) *TNFA*, (d) *DDX58*, and (e) *IFNB1*. Data are means  $\pm$  SEM of three biological replicates. \*\* $p \leq 0.01$ , \*\*\* $p \leq 0.001$ , \*\*\*\* $p \leq 0.0001$  by two-way ANOVA with Bonferroni's post hoc test.

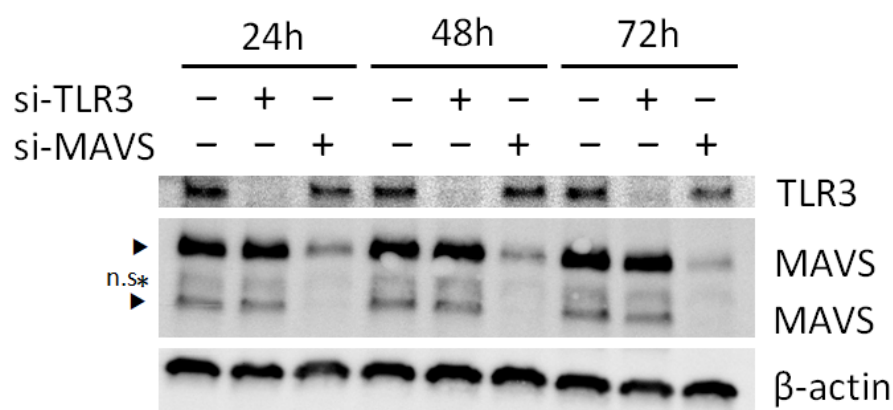

(a)

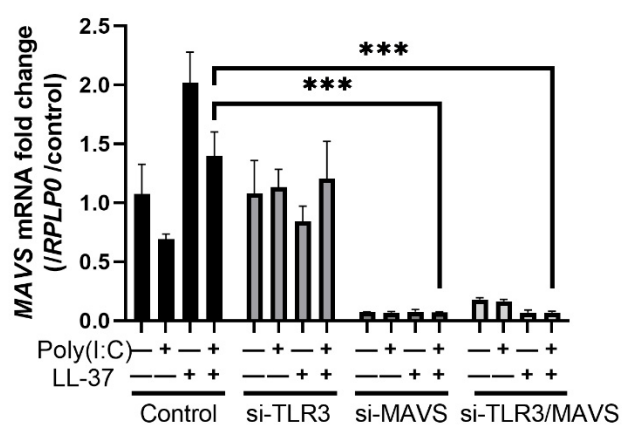

(b)

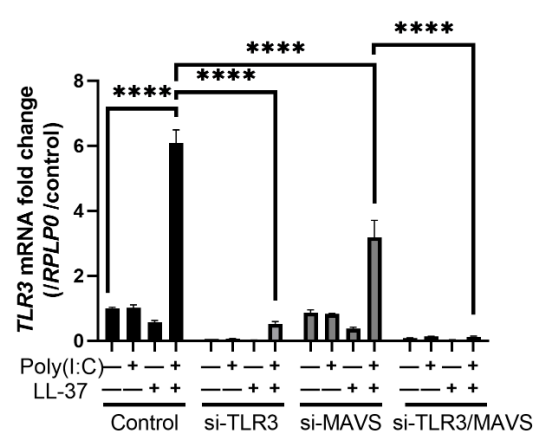

(c)

**Figure S6. siRNAs of TLR3 and MAVS were transfected into NHEKs.**

(a) NHEKs were transfected with control, TLR3 or MAVS siRNA for 24-72 hours, medium was exchanged, and samples were collected after 24 hours. Immunoblotting of TLR3 and MAVS were shown. β-actin was used as a loading control. NHEKs were transfected with TLR3 and MAVS siRNAs alone or in combination for 24 hours and stimulated with LL-37 and poly(I:C). Samples were the same as in Figures 4i-k. Expression of (b) *MAVS* and (c) *TLR3* mRNA was analyzed by RT-PCR. Data are means ± SEM of three biological replicates. NS,  $p > 0.05$ , \*  $p \leq 0.05$ , \*\*\*  $p \leq 0.001$ , by two-way ANOVA with Bonferroni's post hoc test.

**Table S1. List of antibodies.**

| <b>Antibodies</b>                               | <b>Origin</b> | <b>Source</b>        | <b>Identifier</b> | <b>Dilution</b> |
|-------------------------------------------------|---------------|----------------------|-------------------|-----------------|
| CD68 (SR-D1)                                    | Rabbit        | Abcam                | Cat#ab125212      | 1:500           |
| LL-37                                           | Mouse         | Santa Cruz           | Cat#sc-166770     | 1:200           |
| LOX1 (SR-E1)                                    | Rabbit        | Abcam                | Cat#ab60178       | 1:100           |
| RAGE (SR-J1)                                    | Rabbit        | Abcam                | Cat#ab3611        | 1:100           |
| SCARA3 (SR-A3)                                  | Rabbit        | Sigma                | Cat#HPA047386     | 1:200           |
| SR-B1                                           | Rabbit        | Novus<br>Biologicals | Cat#NB400-104     | 1:200           |
| β-actin HRP conjugate                           | Rabbit        | Cell signaling       | Cat#5125          | 1:1000          |
| IRF-3                                           | Rabbit        | Cell signaling       | Cat#4302          | 1:1000          |
| MAVS                                            | Rabbit        | Cell signaling       | Cat#3993          | 1:1000          |
| p38                                             | Rabbit        | Cell signaling       | Cat#9212          | 1:500           |
| Phospho-IRF-3                                   | Rabbit        | Cell signaling       | Cat#4947          | 1:1000          |
| Phospho-p38                                     | Rabbit        | Cell signaling       | Cat#9211          | 1:1000          |
| Phospho-TBK1                                    | Rabbit        | Cell signaling       | Cat#5483          | 1:1000          |
| TLR3                                            | Rabbit        | Cell signaling       | Cat#6961          | 1:1000          |
| TBK1                                            | Rabbit        | Cell signaling       | Cat#3504          | 1:1000          |
| Rabbit IgG, HRP-linked                          | Goat          | Cell signaling       | Cat#7074          | 1:1000          |
| Biotin, HRP-Linked                              | Goat          | Cell signaling       | Cat#7075          | 1:1000-<br>3000 |
| IRDye® 800CW anti-Rabbit IgG                    | Donkey        | LI-COR               | Cat#926-32213     | 1:3000          |
| Duolink® In Situ PLA® Probe<br>Anti-Mouse MINUS | Donkey        | Sigma                | Cat#DUO92004      | N/A             |
| Duolink® In Situ PLA® Probe<br>Anti-Rabbit PLUS | Donkey        | Sigma                | Cat#DUO92002      | N/A             |

**Table S2. Assay ID of quantitative PCR primers and probes.**

| <b>Gene</b>   | <b>Reference sequence</b>     | <b>Taqman® Gene Expression Assay ID</b> |
|---------------|-------------------------------|-----------------------------------------|
| <i>CD68</i>   | NM_001040059.1<br>NM_001251.2 | Hs02836816_g1                           |
| <i>CXCL9</i>  | NM_002416.2                   | Hs00171065_m1                           |
| <i>CXCL10</i> | NM_001565.3                   | Hs00171042_m1                           |
| <i>CXCL11</i> | NM_001302123.1<br>NM_005409.4 | Hs00171138_m1                           |
| <i>DDX58</i>  | NM_014314.3                   | Hs01061436_m1                           |
| <i>IFNB1</i>  | NM_002176.3                   | Hs01077958_s1                           |
| <i>IL6</i>    | NM_000600.4                   | Hs00985639_m1                           |

---

|               |                                                 |               |
|---------------|-------------------------------------------------|---------------|
| <i>IL36G</i>  | NM_001278568.1<br>NM_019618.3                   | Hs00219742_m1 |
| <i>MAVS</i>   | NM_001206491.1<br>NM_020746.4                   | Hs00920075_m1 |
| <i>OLR1</i>   | NM_001172632.1<br>NM_001172633.1<br>NM_002543.3 | Hs01552593_m1 |
| <i>PTGS2</i>  | NM_000963.3                                     | Hs00153133_m1 |
| <i>AGER</i>   | NM_001136.4<br>Other 8 sequences                | Hs00542584_g1 |
| <i>RPLP0</i>  | NM_001002.3<br>NM_053275.3                      | Hs99999902_m1 |
| <i>SCARA3</i> | NM_016240.2<br>NM_182826.1                      | Hs00939871_m1 |
| <i>SCARB1</i> | NM_001082959.1<br>NM_005505.4                   | Hs00969821_m1 |
| <i>TLR3</i>   | NM_003265.2                                     | Hs01551078_m1 |
| <i>TNFA</i>   | NM_000594.3                                     | Hs00174128_m1 |
| <i>VEGFA</i>  | NM_001025366.2<br>Other 19 sequences            | Hs00900055_m1 |

---



---

| Gene         | Reference<br>sequence | Primer sequence (5'-3')                     | Probe sequence (5'-3')      |
|--------------|-----------------------|---------------------------------------------|-----------------------------|
| <i>GAPDH</i> | NM_002046             | GAAGGTGAAGGTCGGAGTC<br>GAAGATGGTGATGGGATTTC | TGGCAAATTCATGGCAC-<br>CGTCA |

---
